# Supplementary material
Source: PubMed Central journal article supplement (PMC10396332)

## SUPPLEMENTAL FIGURE LEGEND

Fig. S1 GAF depletion is as efficient as reported and reduced the focal contact between promoter of *hid* and an intergenic region, related to Fig. 1. sfGFP signal of *sfGFP-GAF(N)* (A) and *GAF<sup>deGradFP</sup>* (B); (C) Quantification of the signal for *sfGFP-GAF(N)* (n=12) and *GAF<sup>deGradFP</sup>* (n=13); (D) The focal contact between promoter of *hid* and a distant 5' intergenic region is lost comparing GAF depletion embryos to the control embryos. The scale bar in B is 50 $\mu$ m. Boxplot in C are represented as mean  $\pm$  SD.

Fig. S2 Insulation is changed at altered toperon anchors and the protein profile at different anchors are different, related to Fig. 2 and Fig. 3. Insulation score around anchor center of changed or unchanged toperon anchors (A) and toperon or non-toperon anchors (B); Protein binding profile around contact anchors different types of contacts (C) and changed or unchanged anchors (D).

Fig. S3. Cooperative binding at the tethering elements is lost in  $\Delta$ POZ at WT CUT&Tag peaks of Halo-GAF in 3rd instar larval wing discs, related to Fig. 3. (A) Histogram of number of GAGAG elements in CUT&Tag peaks. (B) Violin plots of normalized read counts at WT peaks, plotted by the number of non-overlapping GAGAG elements between the start and end coordinates of each peak identified with HOMER (left panel of A). Red dashed lines mark the median read counts of peaks containing 1 or  $\geq$  7 GAGAG elements. (C) log<sub>10</sub> values of median read counts in B show correlation of GAF enrichment and number of GAGAG elements, with  $\Delta$ POZ showing slower increase of enrichment over number of GAGAG elements indicated by a smaller slope of linear regression. (D) Mean GAF CUT&Tag enrichment for all genes  $\pm$ 1kb centered around transcription start sites (TSS). Example Micro-C maps of decreased contacts with GAF CUT&Tag tracks at *smal* and *Ddr* (E) and *tsh* and *tio* (F).

Fig. S4 The loss of  $\Delta$ POZ proteins at the loop anchors, the changes of loops and the expression level in  $\Delta$ POZ mutants, related to Fig. 3 and Fig.4. Linear regression of fold change of GAF protein binding and fold change of loop strength in  $\Delta$ POZ (A) and  $\Delta$ Q (B). (C) Volcano plot for the differentially expressed genes (DEGs) in  $\Delta$ POZ mutants. (D) Profile of the WT or  $\Delta$ POZ GAF near the DEGs transcription start sites. (E) Fraction of changed or unchanged non-toperon contacts in  $\Delta$ POZ mutant. (F) The numbers of non-overlapping GAGAG elements in changed and unchanged anchors have no significant difference ( $p = 0.13$ , two sided, unpaired t test). Note: the sizes of the anchors are designated to be 3201bp, which are most of the time wilder than GAF enriched regions (G) Average distances of neighboring non-overlapping GAGAG elements are significantly smaller in changed than in unchanged anchors ( $p = 0.017$ , two sided, unpaired t test).

Fig. S1 GAF depletion is as efficient as reported and reduced the focal contact between promoter of *hid* and an intergenic region, related to Fig. 1.

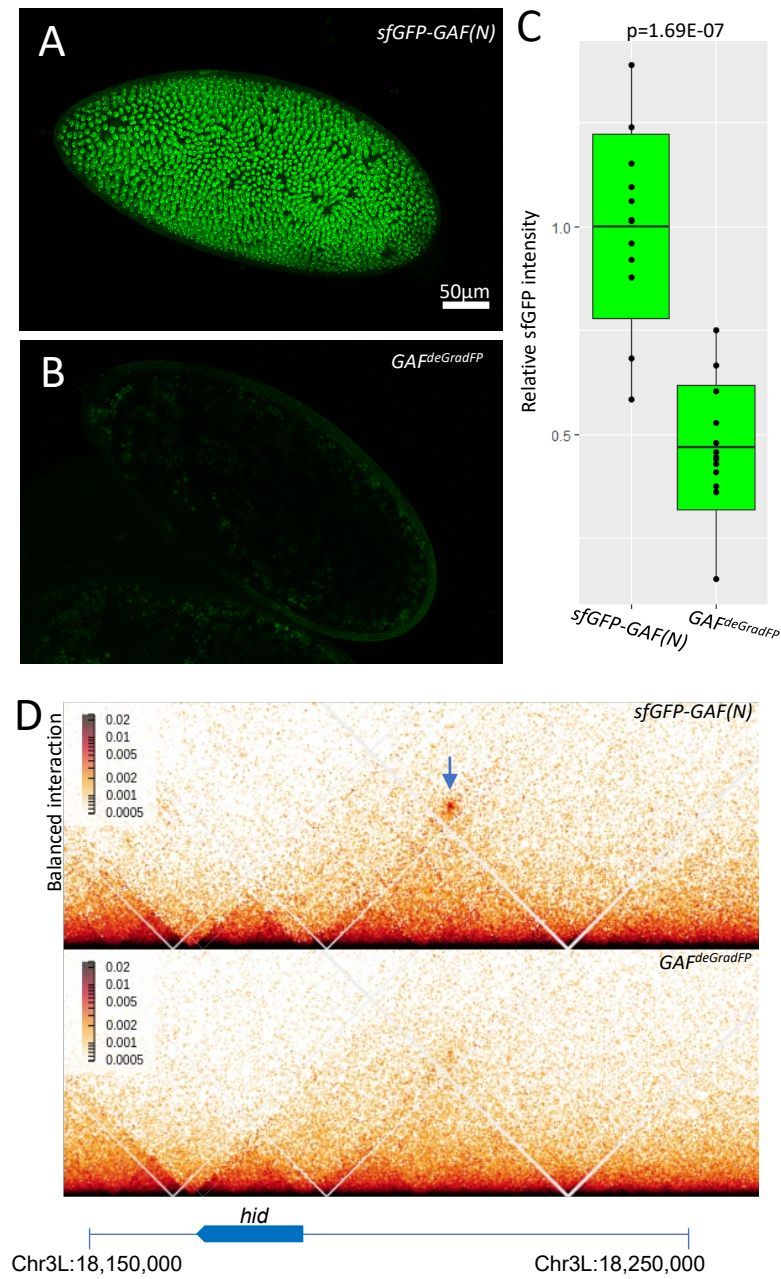

Fig. S2 Insulation is changed at altered toperon anchors and the protein profile at different anchors are different, related to Fig. 2 and Fig. 3.

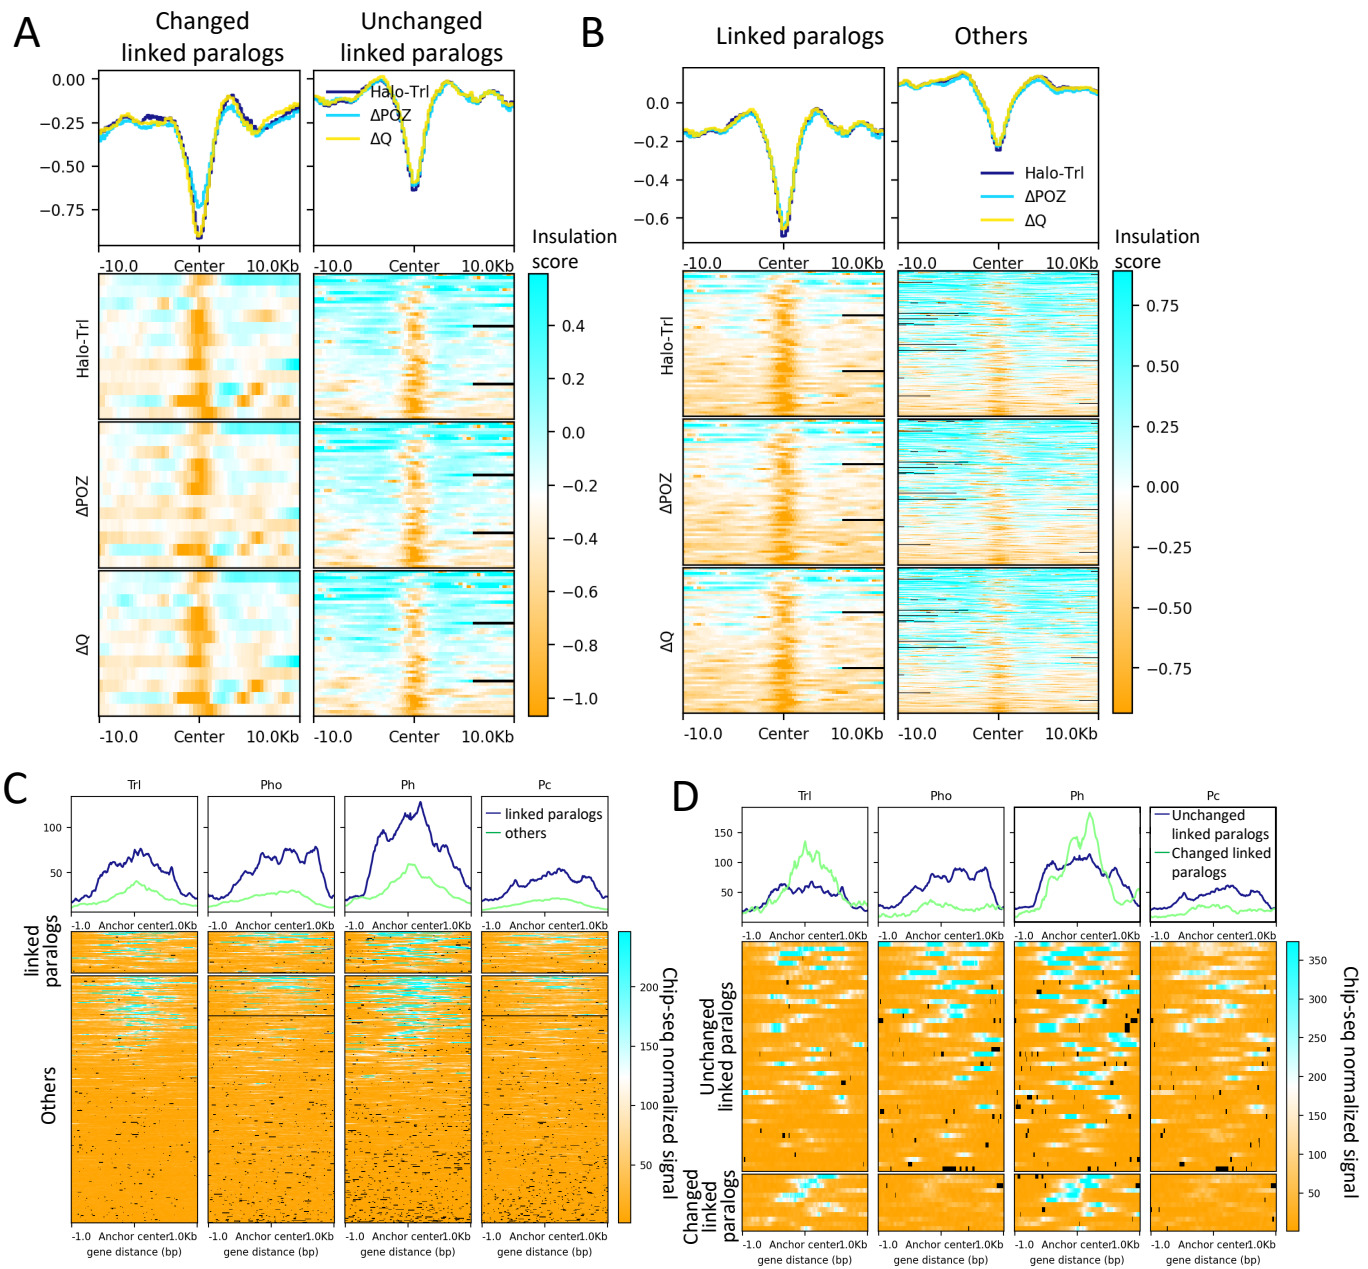

Fig. S3. Cooperative binding of Halo-GAF in 3<sup>rd</sup> instar larval wing discs, related to Fig. 3.

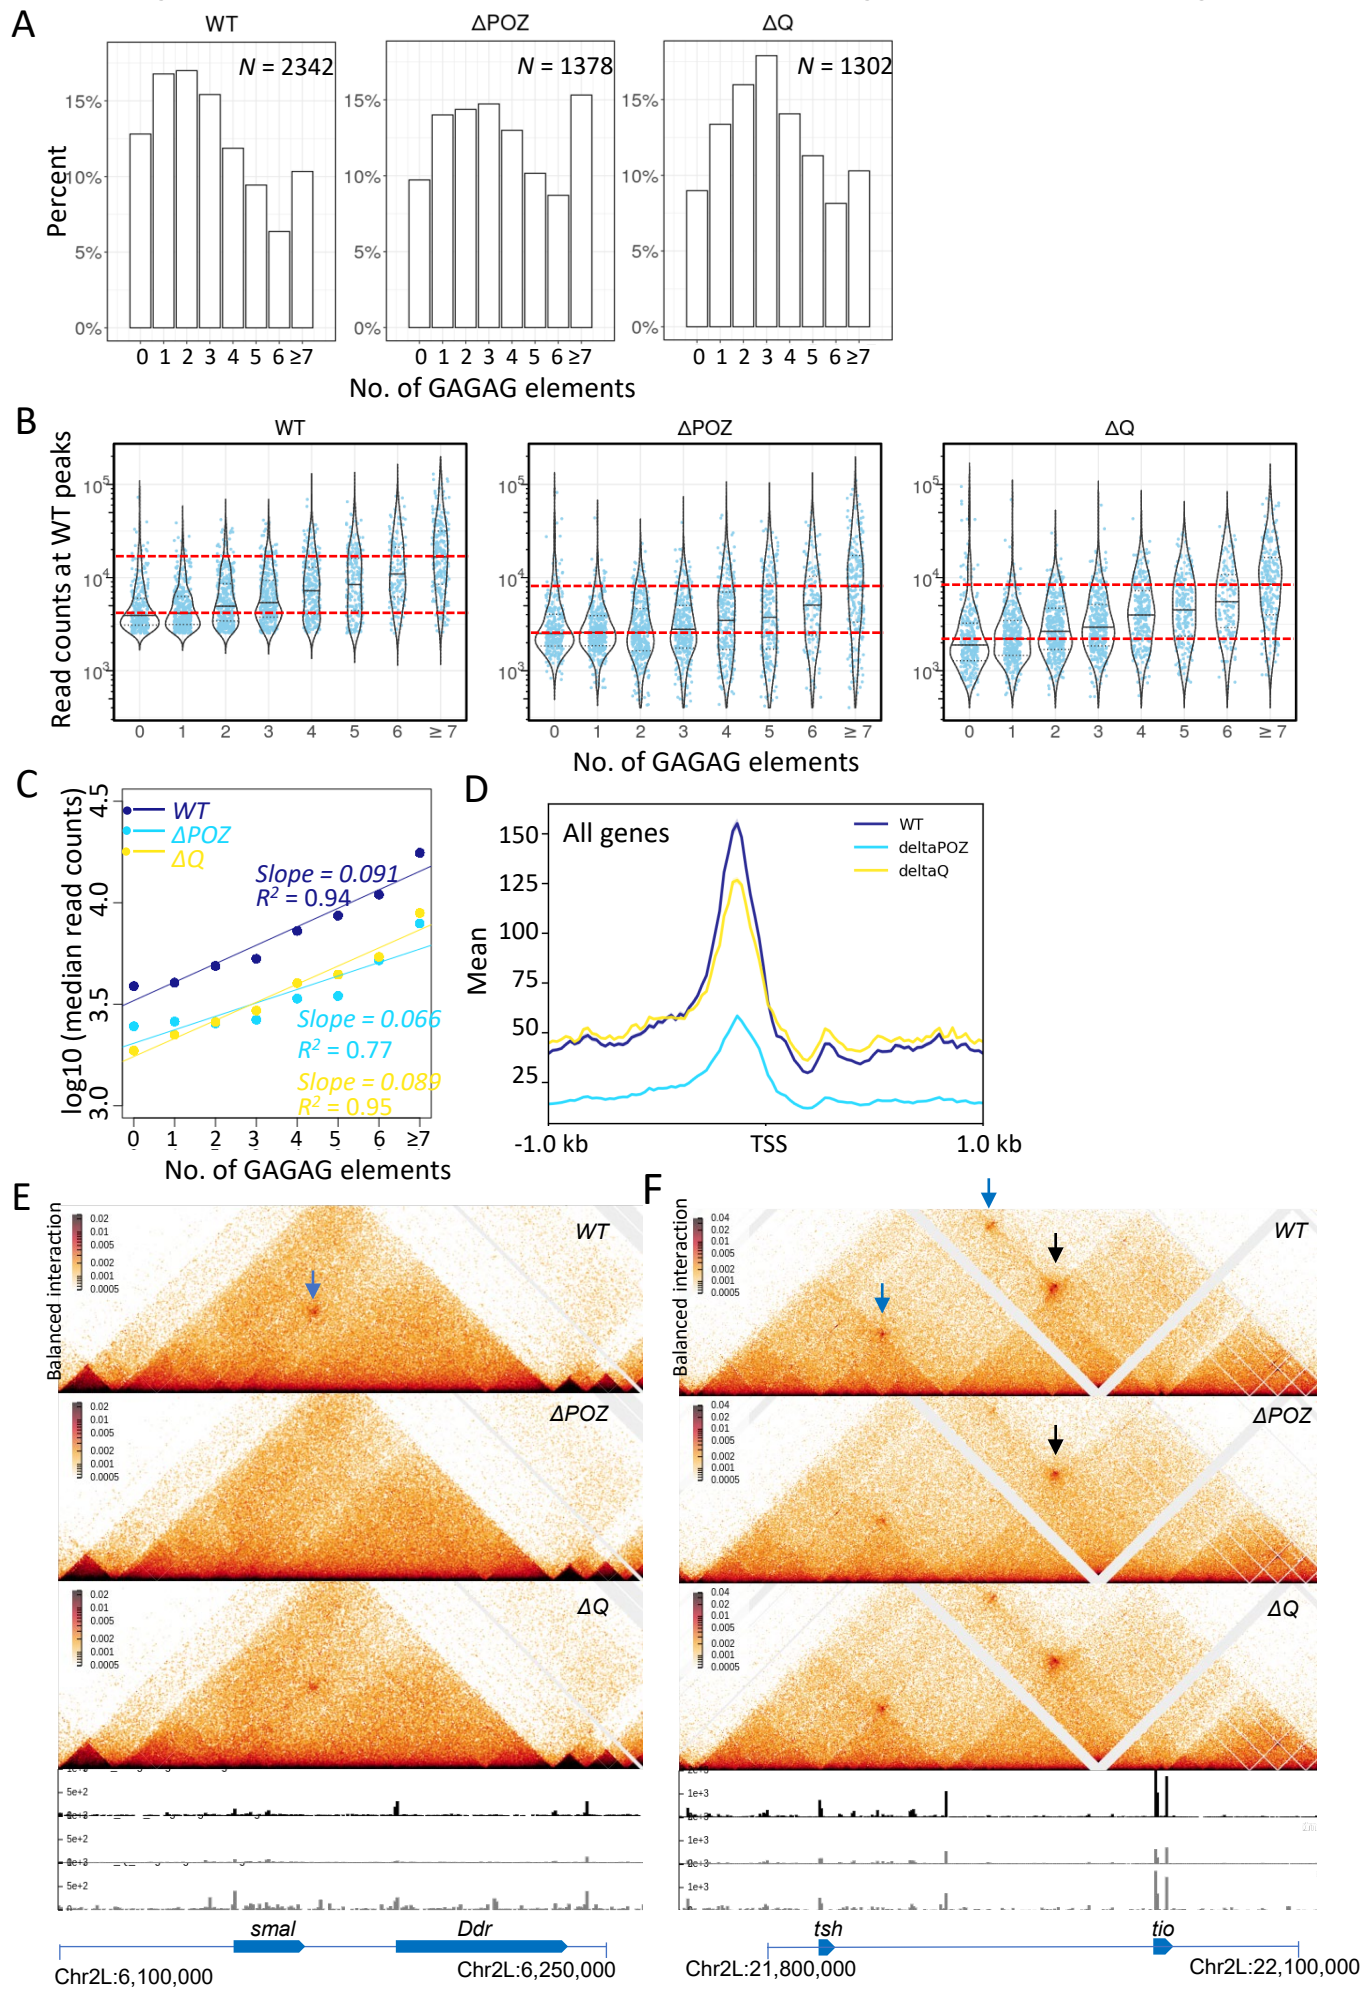



Fig. S4 The loss of  $\Delta$ POZ proteins at the loop anchors, the changes of loops and the expression level in  $\Delta$ POZ mutants, related to Fig. 3 and Fig.4.

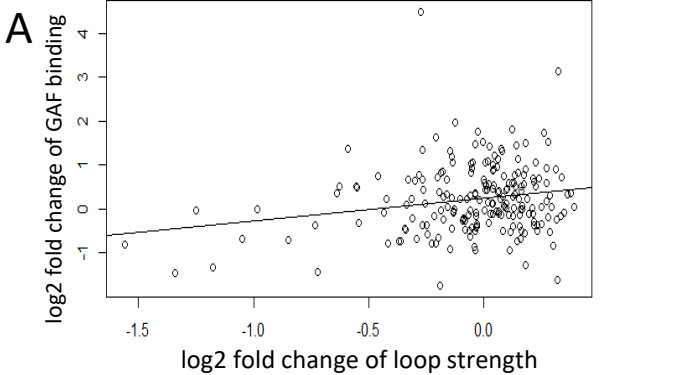

Coefficients:

|                                   | Estimate | Std. Error | t value | Pr(> t ) |
|-----------------------------------|----------|------------|---------|----------|
| Intercept                         | 0.24205  | 0.05371    | 4.507   | 1.10E-05 |
| log2 fold change of loop strength | 0.52363  | 0.17291    | 3.028   | 0.00277  |

Multiple R-squared: 0.04262, Adjusted R-squared: 0.03797  
 F-statistic: 9.171 on 1 and 206 DF  
 p-value: 0.002774

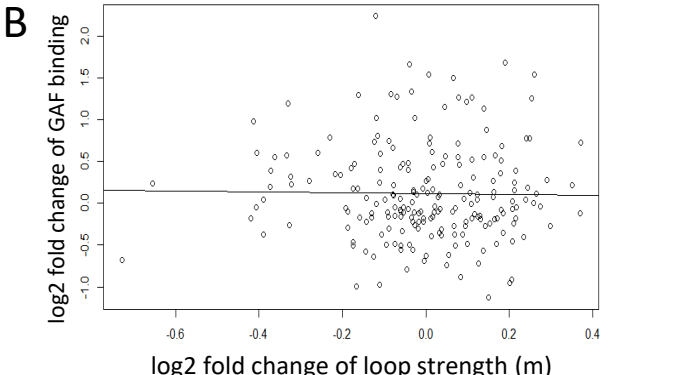

Coefficients:

|                                   | Estimate | Std. Error | t value | Pr(> t ) |
|-----------------------------------|----------|------------|---------|----------|
| Intercept                         | 0.11736  | 0.03946    | 2.974   | 0.00329  |
| log2 fold change of loop strength | -0.05613 | 0.22235    | -0.252  | 0.80096  |

Multiple R-squared: 0.0003092, Adjusted R-squared: -0.04544  
 F-statistic: 0.06372 on 1 and 206 DF  
 p-value: 0.801

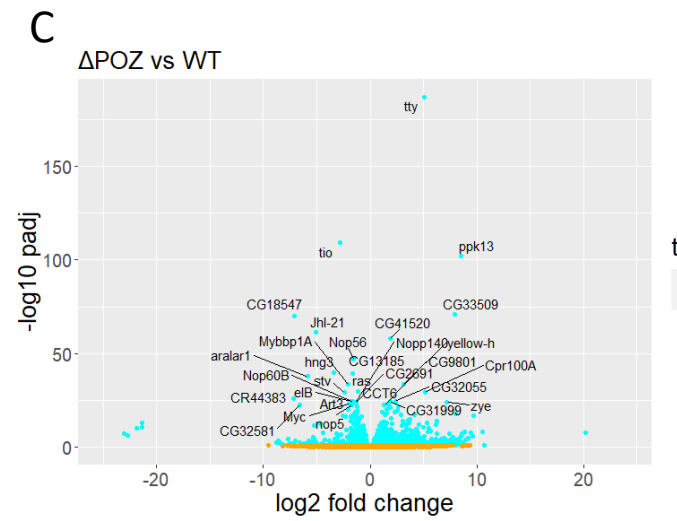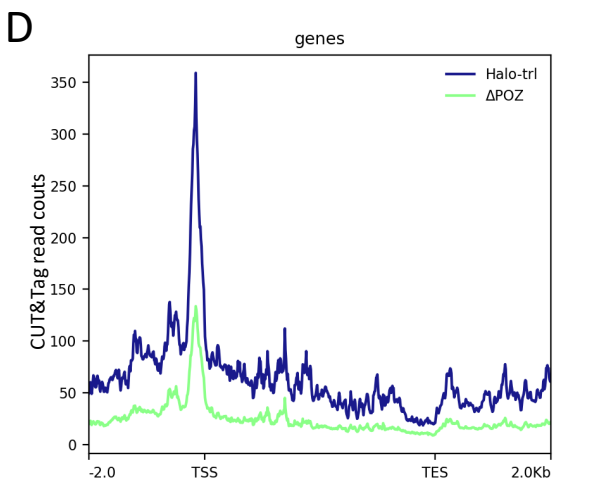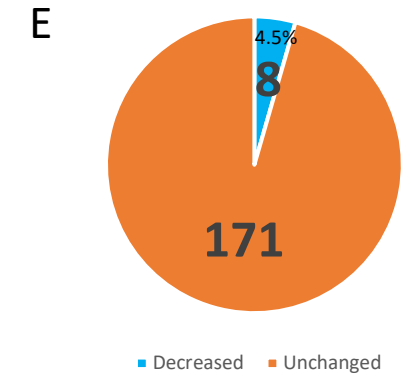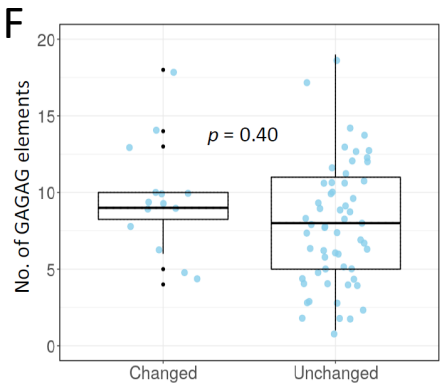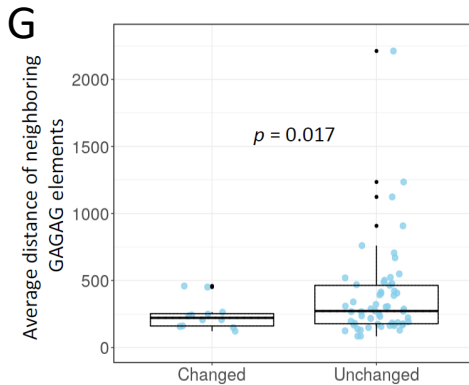

Supplement: NIHMS1896748-supplement-1.pdf [file NIHMS1896748-supplement-1.pdf]
